## COMMENTARY

## Guidelines for molecular genetic detection of susceptibility to malignant hyperthermia<sup>†</sup>

A. Urwyler<sup>1\*</sup>, T. Deufel<sup>2</sup>, T. McCarthy<sup>3</sup> and S. West<sup>4</sup> for the European Malignant Hyperthermia Group

<sup>1</sup>Departments of Anaesthesia and Research, Kantonsspital, University of Basel, CH-4031 Basel, Switzerland.

<sup>2</sup>Institute for Clinical Chemistry and Laboratory Diagnosis, University of Jena, D-07743 Jena, Germany.

<sup>3</sup>Department of Biochemistry, University College Cork, Cork, Republic of Ireland. <sup>4</sup>Northern Genetics Service, Molecular Genetics Unit, Newcastle upon Tyne NE2 4AA, UK

\*Corresponding author

Malignant hyperthermia (MH) is a potentially fatal pharmacogenetic disease triggered by several anaesthetic agents. The *in vitro* muscle contracture test (IVCT) is the standard test to establish an individual's risk of susceptibility to MH. Clinical practitioners and geneticists of the European MH Group have agreed on the present guidelines for the detection of MH susceptibility using molecular genetic techniques and/or IVCT to predict the risk of MH.

*Br J Anaesth* 2001; **86**: 283–7

**Keywords:** complications, malignant hyperthermia; genetic factors, molecular genetics

Accepted for publication: September 12, 2000

Malignant hyperthermia (MH) is a potentially fatal pharmacogenetic disease triggered by commonly used potent inhalation anaesthetics and/or succinylcholine. The *in vitro* muscle contracture test (IVCT) is the standard test to establish an individual's risk of susceptibility to MH.<sup>1</sup> The European MH Group has developed a standardized protocol for the IVCT and has initiated and fostered international collaborative molecular genetic studies to investigate the molecular basis of MH. Data from these studies demonstrate that MH displays a high level of locus heterogeneity. Thus, it is not feasible to diagnose MH susceptibility, and, more specifically, to exclude MH risk, on the basis of a simple genetic test alone. However, it is of utmost importance to avoid false MH-negative (MHN) diagnoses because of the potential risk of MH during general anaesthesia for these patients and their offspring. These general obstacles notwithstanding, there may be specific situations where genetic data provide additional diagnostic information or contribute information independent of IVCT. It is the purpose of this document to outline recommended procedures for the potential diagnostic use of such genetic findings depending on the different clinical situations that may arise.

### Referrals

The usual route of entry for individuals into MH investigations follows a suspected MH crisis and referral of the patient to an MH Investigation Unit, where diagnostic

procedures and genetic counselling should be performed according to Figure 1.

### IVCT

An IVCT is performed on the patient or, if the patient is too young or has not survived the anaesthetic event, his or her parents. If MH susceptibility status is confirmed by IVCT, then there is a clinical responsibility to offer the IVCT to the relatives of the index case, assuming autosomal dominant inheritance and starting with first-degree relatives.

### Genetic investigations

#### *Mutation analysis*

At this stage, molecular genetic testing for causative mutations in the ryanodine receptor gene (*RYR1*) of the index case could lead to quicker results for the rest of the kinship. An up-to-date list of mutations that have been shown to directly alter *RYR1* caffeine or halothane sensitivity is shown in Table 1.

Genetic analysis should be performed in, or only after consultation with an MH Investigation Unit. Once a causative mutation has been detected in the proband or index patient, it can be used to test relatives who have not

<sup>†</sup>This article is accompanied by Editorial III.

yet been tested by the IVCT. Mutation carriers should consequently be regarded as susceptible to MH. However, family members who do not carry the mutation observed in the pedigree should still undergo IVCT investigation. The reason for such caution is the observation in several pedigrees investigated by members of the European MH

Group of discordance between genetic and IVCT results, implicating a second MH susceptibility gene segregating in the kinship.<sup>2,3</sup>

### Segregation analysis

Once the MH status of the extended pedigree (e.g. 10 informative meioses) has been determined by the IVCT, it may be possible to undertake genetic segregation analysis with markers close to known MH susceptibility loci. An up-to-date list of recommended markers and details of genetic modelling compiled by the European Malignant Hyperthermia Group, Genetics Section, is available on the internet (<http://www.emhg.org>).

Rarely, a single pedigree may be sufficiently large to establish linkage to a candidate locus with a high probability (lod score >3.0). In such a situation the question arises as to whether or not haplotype analysis can be used to assign MH status. Under these circumstances, individuals carrying the high-risk haplotype should be regarded as susceptible to MH even without confirmation by a positive IVCT. The converse is not true, that is, identification of the low-risk haplotype does not equate with MHN status and such individuals should have IVCT determination of their MH status.

In families where linkage to a candidate gene, *RYR1* or another locus, is suggested but not firmly established (i.e. lod score <3.0) haplotype analysis for predictive testing is not appropriate due to the high level of locus heterogeneity in MH. In such families, however, it is desirable to search for unknown mutations in the suggested candidate gene for research purposes.

Failure to reach a lod score of +3.0 in a single family due to the occurrence of a single individual in whom there is recombination between the haplotype and IVCT-deter-

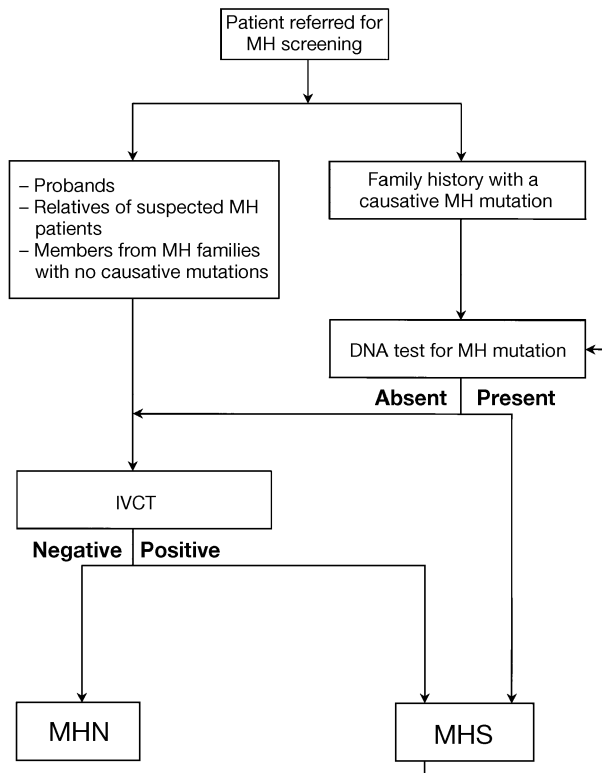

**Fig 1** Suggested route for MH susceptibility testing. IVCT=*in vitro* muscle contracture test; MHN=malignant hyperthermia negative; MHS=malignant hyperthermia susceptible.

**Table 1** List of *RYR1* mutations potentially causative for MH susceptibility (MHS) and central core disease (CCD). Residue numbering within the *RYR1* nucleotide and amino acid sequence corresponds to the human *RYR1* sequence according to Zorzato and colleagues<sup>18</sup> (accession number J05200.1), updated according to Zhang and colleagues<sup>16</sup> and Phillips and colleagues.<sup>19</sup> Functional characterization of the *RYR1* mutations on *RYR1* channel activity have been performed by calcium photometry on myotubes and/or COS-7 or HEK cells transfected with *RYR1* genes bearing the mutations<sup>20–24</sup>

| Exon | Mutation position<br>codon change | RYR1 amino<br>acid change | Functional comparison with wild-type RYR1 |                       | Phenotype        | Estimated<br>incidence | Reference |
|------|-----------------------------------|---------------------------|-------------------------------------------|-----------------------|------------------|------------------------|-----------|
|      |                                   |                           | Caffeine sensitivity                      | Halothane sensitivity |                  |                        |           |
| 2    | 103TGC→CGC                        | Cys35→Arg                 | no difference                             | increased             | MHS              | one family             | 4         |
| 6    | 487CGC→TGC                        | Arg163→Cys                | increased                                 | increased             | MHS and/or CCD   | 2%                     | 5         |
| 9    | 742GGG→AGG                        | Gly248→Arg                | increased                                 | increased             | MHS              | one family             | 6         |
| 11   | 1021GGG→AGG                       | Gly341→Arg                | increased                                 | increased             | MHS              | 6 – 10%                | 7         |
| 12   | 1209ATC→ATG                       | Ile403→Met                | increased                                 | increased             | CCD; MHS unknown | one family             | 5         |
| 14   | 1565TAT→TCT                       | Tyr522→Ser                | increased                                 | increased             | MHS and/or CCD   | one family             | 8         |
| 15   | 1654CGG→TGG                       | Arg552→Trp                | increased                                 | increased             | MHS              | one family             | 9         |
| 17   | 1840CGC→TGC                       | Arg614→Cys                | increased                                 | increased             | MHS              | 4 – 9%                 | 10        |
| 17   | 1841CGC→CTC                       | Arg614→Leu                | increased                                 | increased             | MHS              | 2%                     | 11        |
| 39   | 6487CGC→TGC                       | Arg2163→Cys               | increased                                 | increased             | MHS              | 4%                     | 12        |
| 39   | 6488CGC→CAC                       | Arg2163→His               | increased                                 | increased             | MHS and/or CCD   | one family             | 12        |
| 45   | 7300GGA→AGA                       | Gly2434→Arg               | increased                                 | increased             | MHS              | 4–10%                  | 13–15     |
| 45   | 7304CGC→CAC                       | Arg2435→His               | increased                                 | increased             | MHS and/or CCD   | one family             | 16        |
| 46   | 7372CGC→TGC                       | Arg2458→Cys               | increased                                 | increased             | MHS              | 4%                     | 17        |
| 46   | 7373CGC→CAC                       | Arg2458→His               | increased                                 | increased             | MHS              | 4%                     | 17        |

mined MH status will require closer scrutiny and possible reassessment of the genetic and bioassay results to attempt to resolve the basis of the discordance. For predictive diagnosis in such families, the more conservative estimation, i.e. the higher risk outcome (either the MH susceptibility test result from the IVCT or the high-risk haplotype) should be the basis for the clinical decision.

## Appendix

### *MH Investigation Units in Europe*

#### **Austria**

Prof. H. Gilly  
Klinik für Anästhesie und allgemeine Intensivmedizin der Universität Wien  
Spitalgasse 23  
A-1090 Wien

Prof. W.W. Lingnau  
Univ. Klinik für Anaesthesie und Allgemeine Intensivmedizin  
Anichstrasse 35  
A-6020 Innsbruck

#### **Belgium**

Prof. L. Heytens  
Department of Intensive Care  
Universitair Ziekenhuis Antwerpen  
Wilrijkstraat 10  
B-2650 Edegem

#### **Denmark**

Dr K. Glahn  
The Danish Malignant Hyperthermia Register  
Department of Anaesthesia  
Herlev University Hospital  
DK-2730 Herlev

#### **France**

Prof. R. Krivosic-Horber  
Département d'Anesthésie Réanimation  
Hôpital B  
Centre Hospitalier Régional Universitaire  
Bd. du Professeur J. Leclercq  
F-59037 Lille

Prof. Y. Nivoche  
Département d'Anesthésie  
Hôpital Robert Debré  
48 Bd. Serurier  
F-75935 Paris Cedex 19

#### **Germany**

Prof. W. Mortier

Klinik für Kinder- und Jugendmedizin der Universität Bochum  
St Josefs-Hospital  
Alexandrinenstrasse 5  
D-44791 Bochum  
Priv.-Doz. Dr F. Wappler  
University Hospital Eppendorf  
Department of Anaesthesiology  
Martinistrasse 52  
D-20246 Hamburg

Prof. D. Olthoff  
Klinik und Poliklinik für Anästhesiologie und Intensivtherapie der Universität Leipzig  
Liebigstrasse 20a  
D-04103 Leipzig

Dr I. Tzanova  
Klinik für Anästhesie  
Uniklinik Mainz  
Langenbeckstrasse 1  
D-55131 Mainz

Prof. F. Lehmann-Horn  
Institut für angewandte Physiologie der Universität Ulm  
Albert-Einstein-Allee 11  
D-89081 Ulm

Dr M. Anetseder  
Institut für Anästhesiologie der Universität Würzburg  
Josef Schneider Strasse 2  
D-97080 Würzburg

#### **Iceland**

Prof. S. Sigurdsson  
Department of Physiology  
University of Iceland  
IS-101 Reykjavik

#### **Ireland**

Prof. J.J.A. Heffron  
Department of Biochemistry  
University College  
Cork

#### **Italy**

Dr V. Tegazzin  
Department of Anaesthesiology  
Traumatic-Orthopaedic Hospital  
Via Facciolati 71  
I-35127 Padova

Prof. V. Brancadoro  
Institute of Anaesthesiology  
Università degli Studi di Napoli Federico II  
Via S. Pansini 5  
I-80131 Napoli

Dr S. Cozzolino  
Settore Biofarmacologico A.O. Cardarelli  
Via S. Giacomo dei Capri 66  
I-80131 Napoli

### The Netherlands

Dr M. Snoek  
Department of Anaesthesiology  
CWZ, C40-01  
PO Box 9015  
N-6500 Nijmegen

### Norway

Dr T. Fagerlund  
Institute of Medical Genetics  
Ullevål Sykehus  
N-0407 Oslo

### Sweden

Dr G. Islander  
Department of Anaesthesia  
University Hospital  
S-221 85 Lund

### Switzerland

Prof. A. Urwyler  
Departement Anästhesie  
Universitätsklinik  
Kantonsspital  
CH-4031 Basel

### UK

Prof. F.R. Ellis  
MH Investigation Unit  
Clinical Sciences Building  
St James's University Hospital  
Leeds LS9 7TF

## References

- Ording H for the European Malignant Hyperthermia Group. *In vitro* contracture test for the diagnosis of malignant hyperthermia following the protocol of the European MH Group: results of testing patients surviving fulminant MH and unrelated low-risk subjects. *Acta Anaesthesiol Scand* 1997; **41**: 955–66
- Deufel T, Sudbrak R, Feist Y, *et al.* Discordance, in a malignant hyperthermia pedigree, between *in vitro* contracture-test phenotypes and haplotypes for the *MHS1* region on chromosome 19q12–13.2, comprising the C1840T transition in the *RYR1* gene. *Am J Hum Genet* 1995; **56**: 1334–42
- Adekun AM, West SP, Ellis FR, *et al.* The G1021A substitution in the *RYR1* gene does not cosegregate with malignant hyperthermia susceptibility in a British pedigree. *Am J Hum Genet* 1997; **60**: 833–41
- Lynch PJ, Krivosic-Horber R, Reyford H, *et al.* Identification of heterozygous and homozygous individuals with the novel *RYR1* mutation Cys35Arg in a large kindred. *Anesthesiology* 1997; **86**: 620–6
- Quane KA, Healy JM, Keating KE, *et al.* Mutations in the ryanodine receptor gene in central core disease and malignant hyperthermia. *Nature Genet* 1993; **5**: 51–5
- Gillard EF, Otsu K, Fujii J, *et al.* Polymorphisms and deduced amino acid substitutions in the coding sequence of the ryanodine receptor (*RYR1*) gene in individuals with malignant hyperthermia. *Genomics* 1992; **13**: 1247–54
- Quane KA, Keating KE, Manning BM, *et al.* Detection of a novel common mutation in the ryanodine receptor gene in malignant hyperthermia: implications for diagnosis and heterogeneity studies. *Hum Mol Genet* 1994; **3**: 471–6
- Quane KA, Keating KE, Healy JM, *et al.* Mutation screening of the *RYR1* gene in malignant hyperthermia: detection of a novel Tyr to Ser mutation in a pedigree with associated central cores. *Genomics* 1994; **23**: 236–9
- Keating KE, Giblin L, Lynch PJ, *et al.* Detection of a novel mutation in the ryanodine receptor gene in an Irish malignant hyperthermia pedigree: correlation of the IVCT response with the affected and unaffected haplotypes. *J Med Genet* 1997; **34**: 291–6
- Gillard EF, Otsu K, Fujii J, *et al.* A substitution of cysteine for arginine 614 in the ryanodine receptor is potentially causative of human malignant hyperthermia. *Genomics* 1991; **11**: 751–5
- Quane KA, Ording H, Keating KE, *et al.* Detection of a novel mutation at amino acid position 614 in the ryanodine receptor in malignant hyperthermia. *Br J Anaesth* 1997; **79**: 332–7
- Manning BM, Quane KA, Ording H, *et al.* Identification of novel mutations in the ryanodine-receptor gene (*RYR1*) in malignant hyperthermia: genotype–phenotype correlation. *Am J Hum Genet* 1998; **62**: 599–609
- Keating KE, Quane KA, Manning BM, *et al.* Detection of a novel *RYR1* mutation in four malignant hyperthermia pedigrees. *Hum Mol Genet* 1994; **3**: 1855–8
- Phillips MS, Khanna VK, De Leon S, Frodis W, Britt BA, MacLennan DH. The substitution of Arg for Gly2433 in the human skeletal muscle ryanodine receptor is associated with malignant hyperthermia. *Hum Mol Genet* 1994; **3**: 2181–6
- Brandt A, Schleithoff L, Jurkat-Rott K, Klingler W, Baur C, Lehmann-Horn F. Screening of the ryanodine receptor gene in 105 malignant hyperthermia families: novel mutations and concordance with the *in vitro* contracture test. *Hum Mol Genet* 1999; **8**: 2055–62
- Zhang Y, Chen HS, Khanna VK, *et al.* A mutation in the human ryanodine receptor gene associated with central core disease. *Nature Genet* 1993; **5**: 46–50
- Manning BM, Quane KA, Lynch PJ, *et al.* Novel mutations at a CpG dinucleotide in the ryanodine receptor in malignant hyperthermia. *Hum Mutat* 1998; **11**: 45–50
- Zorzato F, Fujii J, Otsu K, *et al.* Molecular cloning of cDNA encoding human and rabbit forms of the Ca<sup>2+</sup> release channel (ryanodine receptor) of skeletal muscle sarcoplasmic reticulum. *J Biol Chem* 1990; **265**: 2244–56
- Phillips MS, Fujii J, Khanna VK, *et al.* The structural organization of the human skeletal muscle ryanodine receptor (*RYR1*) gene. *Genomics* 1996; **34**: 24–41
- Otsu K, Nishida K, Kimura Y, *et al.* The point mutation Arg615→Cys in the Ca<sup>2+</sup> release channel of skeletal sarcoplasmic reticulum is responsible for hypersensitivity to caffeine and halothane in malignant hyperthermia. *J Biol Chem* 1994; **269**: 9413–15
- Treves S, Larini F, Menegazzi P, *et al.* Alteration of intracellular Ca<sup>2+</sup> transients in COS-7 cells transfected with the cDNA encoding skeletal-muscle ryanodine receptor carrying a mutation

- associated with malignant hyperthermia. *Biochem J* 1994; **301**: 661–5
- 22** Tong J, Oyamada H, Demareux N, Grinstein S, McCarthy TV, MacLennan DH. Caffeine and halothane sensitivity of intracellular  $\text{Ca}^{2+}$  release is altered by 15 calcium release channel (ryanodine receptor) mutations associated with malignant hyperthermia and/or central core disease. *J Biol Chem* 1997; **272**: 26332–9
- 23** Censier K, Urwyler A, Zorzato F, Treves S. Intracellular calcium homeostasis in human primary muscle cells from malignant hyperthermia-susceptible and normal individuals. Effect of overexpression of recombinant wild-type and Arg163Cys mutated ryanodine receptors. *J Clin Invest* 1998; **101**: 1233–42
- 24** Lynch PJ, Tong J, Lehane M, et al. A mutation in the transmembrane/luminal domain of the ryanodine receptor is associated with abnormal  $\text{Ca}^{2+}$  release channel function and severe central core disease. *Proc Natl Acad Sci USA* 1999; **96**: 4164–9
